# Supplementary material for: Evaluating the Perceived Health-Related Effectiveness of ‘The Daily Mile’ Initiative in Irish Primary Schools
Source: Preprints.org preprint supplement (doi:10.20944/preprints202406.0377.v1), 2024-06-07
Supplement: Supplementary file 1 [file supplementary]

**Supplement 2. Questions from interviews and focus groups**

| **No.** | **Principal Interview** | **Teacher Focus Group** | **Child Focus Group** |
| --- | --- | --- | --- |
| Q1 | Can you describe how the implementation of TDM has gone since it was first introduced in your school? | Can you describe how the implementation of TDM has gone with your class since it was first introduced in your school? | Can you please explain to me about what is happening in the picture you drew about TDM? |
| Q2 | For you, what barriers would you associate with the successful implementation of TDM in your school? | For you, what barriers would you associate with the successful implementation of TDM with your class group? | What do you enjoy most about participating in TDM? |
| Q3 | What adaptations or additions would you make to TDM to improve the implementation success of the initiative within your school? | What adaptations or additions would you make to TDM to improve the implementation success of the initiative with your class group? | What do you not like about participating in TDM? |
| Q4 | How is TDM successfully implemented by various classes on a typical school day? | Please explain, how you and other teachers in your school successfully implement TDM with your class groups on a typical school day? | Is there any reason why your class would not participate in TDM on a school day? |
| Q5 | What impact, if any, has COVID-19 had on the implementation of TDM in your school? | What impact has COVID-19 had on the implementation of TDM with your class group? | Would you like your class and school to continue participating in TDM? |
| Q6 | Would you like to see your school commit to implementing TDM in the long-term? | Would you like to continue implementing TDM with your class in the long-term? | N/A |
